# Supplementary material for: The European guideline on management of major bleeding and coagulopathy following trauma: sixth edition
Source: Springer Nature journal article supplement (doi:10.1186/s13054-023-04327-7), 2023-03-01
Supplement: MOESM1 [file 24080168]

The European guideline on management of major bleeding and coagulopathy following trauma: Sixth edition

Additional file 1: Summary of PICOs

| PICO    | Population (P)                                                                                                                                                                                                                                                                                                                                                                                     | Intervention (I)                                                                                                                                                                                                                                                                                                                                                                                                                                                                                                                                                                     | Comparison (C)                                                                                                                                                                                                                                                                    | Search bundle |
|---------|----------------------------------------------------------------------------------------------------------------------------------------------------------------------------------------------------------------------------------------------------------------------------------------------------------------------------------------------------------------------------------------------------|--------------------------------------------------------------------------------------------------------------------------------------------------------------------------------------------------------------------------------------------------------------------------------------------------------------------------------------------------------------------------------------------------------------------------------------------------------------------------------------------------------------------------------------------------------------------------------------|-----------------------------------------------------------------------------------------------------------------------------------------------------------------------------------------------------------------------------------------------------------------------------------|---------------|
| PICO 1  | <ul style="list-style-type: none"> <li>All adult trauma patients with severe bleeding</li> <li>Need a corporal cavity (surgical) to collect autologous blood</li> </ul>                                                                                                                                                                                                                            | <ul style="list-style-type: none"> <li>Use of cell salvage during resuscitation to collect and retransfuse washed autologous blood</li> </ul>                                                                                                                                                                                                                                                                                                                                                                                                                                        | <ul style="list-style-type: none"> <li>No use of cell salvage and autologous transfusion during resuscitation. Use only allogeneic blood to treat severe blood loss and anaemia</li> </ul>                                                                                        | 8             |
| PICO 2* | <ul style="list-style-type: none"> <li>Adults, severe trauma and haemorrhage</li> </ul>                                                                                                                                                                                                                                                                                                            | <ul style="list-style-type: none"> <li>Use a simulation educational tool, clinical debrief or after-action review during the rationale for the recommendations of the trauma guidelines</li> <li>Clinical debriefing topics following experiences with trauma patients: decision making, communication, resource utilisation, space, equipment, environmental, leadership, situational awareness, teamwork</li> <li>Assessment tools for cognitive biases and personality traits and their potential impact on physicians' decisions, medical errors and patient outcomes</li> </ul> | <ul style="list-style-type: none"> <li>Any quality assurance reporting from facilitation strategies: debriefings or actions reviews, standard care or no simulation, standard care</li> </ul>                                                                                     | 11            |
| PICO 3  | <p>Adult trauma patients:</p> <ul style="list-style-type: none"> <li>with severe or multiple injuries</li> <li>with multiple injuries</li> <li>with severe injuries</li> <li>with polytrauma</li> <li>with (acute) trauma haemorrhage</li> <li>with haemorrhagic shock</li> <li>with severe bleeding</li> <li>with ongoing haemorrhage</li> <li>with an injury ISS <math>\geq 16</math></li> </ul> | <ul style="list-style-type: none"> <li>Transportation to trauma centre or level 1 trauma centre</li> <li>Minimize time between injury and bleeding control</li> <li>Time between arrival at hospital and start of emergency laparotomy &lt;60 min</li> <li>Time between arrival at hospital and start of first red blood cell</li> </ul>                                                                                                                                                                                                                                             | <ul style="list-style-type: none"> <li>Transportation to a non-trauma centre or a non-level 1 trauma centre</li> <li>Standard care, no effort to optimise bleeding control time</li> <li>Time between arrival at hospital and start of emergency laparotomy &lt;60 min</li> </ul> | 9             |

The European guideline on management of major bleeding and coagulopathy following trauma: Sixth edition

|               |                                                                                                                                                                                                                                                                                                                                                                                                                                      |                                                                                                                                                                                                                                                                                                                                                                              |                                                                                                                                                                                                                                                                                                                                       |    |
|---------------|--------------------------------------------------------------------------------------------------------------------------------------------------------------------------------------------------------------------------------------------------------------------------------------------------------------------------------------------------------------------------------------------------------------------------------------|------------------------------------------------------------------------------------------------------------------------------------------------------------------------------------------------------------------------------------------------------------------------------------------------------------------------------------------------------------------------------|---------------------------------------------------------------------------------------------------------------------------------------------------------------------------------------------------------------------------------------------------------------------------------------------------------------------------------------|----|
|               |                                                                                                                                                                                                                                                                                                                                                                                                                                      | <ul style="list-style-type: none"> <li>(RBC) transfusion &lt;60 min if transfused</li> <li>• Time between arrival at hospital and packing of pelvis &lt;60 min</li> <li>• Time between arrival at hospital and start of any emergency surgery &lt;60 min</li> </ul>                                                                                                          | <ul style="list-style-type: none"> <li>• Time between arrival at hospital and start of first RBC transfusion &lt;60 min if transfused</li> <li>• Time between arrival at hospital and packing of pelvis &lt;60 min</li> <li>• Time between arrival at hospital and start of any emergency surgery ≥60 min</li> </ul>                  |    |
| <b>PICO 4</b> | <ul style="list-style-type: none"> <li>• Trauma patients with severe- or life-threatening bleeding from extremity injuries</li> </ul>                                                                                                                                                                                                                                                                                                | <ul style="list-style-type: none"> <li>• Application of tourniquet</li> <li>• Application of a pelvic binder</li> </ul>                                                                                                                                                                                                                                                      | <ul style="list-style-type: none"> <li>• No tourniquet when compression</li> <li>• No use of pelvic binder</li> <li>• Standard care</li> </ul>                                                                                                                                                                                        | 2  |
| <b>PICO 5</b> | <ul style="list-style-type: none"> <li>• All adult trauma patients:</li> <li>• with trauma haemorrhage (blood loss &gt;2 L)</li> <li>• with bleeding (blood loss &gt;2 L)</li> <li>• with haemorrhagic shock (systolic blood pressure &lt;90 mmHg)</li> <li>• with haemorrhagic shock (shock index &gt;0.9)</li> <li>• with multiple injuries</li> <li>• with penetrating injuries</li> <li>• with blunt injuries</li> </ul>         | <ul style="list-style-type: none"> <li>• Assessment of mechanism of injury (high velocity/speed, high energy, fall height)</li> <li>• Assessment of magnitude of injury (e.g., through injury severity core [ISS])</li> <li>• Assessment of anatomical injury (abbreviated injury scale [AIS]; all body regions ≥2)</li> <li>• Assessment of the shock-index (SI)</li> </ul> | <ul style="list-style-type: none"> <li>• Assessment of mechanism of injury</li> <li>• No assessment of magnitude of injury</li> <li>• No assessment of anatomical injury</li> <li>• No assessment of the shock-index (SI)</li> <li>• Assessment of heart rate alone</li> <li>• Assessment of systolic blood pressure alone</li> </ul> | 10 |
| <b>PICO 6</b> | <ul style="list-style-type: none"> <li>• Adult trauma patients in severe shock and/or with an obvious source of bleeding and/or extremis</li> </ul> <p>*Severe shock is approximately a blood loss of more than 40% of the blood volume (ATLS® classification) or a base deficit &gt;10 mmol [1]. An extremis is the patient who is “trying to die” or the last minute or minutes before the heart stops due to severe bleeding.</p> | <ul style="list-style-type: none"> <li>• Immediate intervention, surgical and/or angiographic to control bleeding</li> </ul>                                                                                                                                                                                                                                                 | <ul style="list-style-type: none"> <li>• Delayed bleeding control/intervention</li> </ul>                                                                                                                                                                                                                                             | 1  |

The European guideline on management of major bleeding and coagulopathy following trauma: Sixth edition

|                      |                                                                                                                           |                                                                                                                                                                                                                                                                                                                                                                                                                                                                                                                                                                                                                                                                                                                                                                                                                                                                                                                                                                                                                                                                                                                                                                                                                                                |                                                                                                                                                                                                                                                                                                                                                                                                                                                                                                                                                                                                                                                                                                                                                                                                                                          |          |
|----------------------|---------------------------------------------------------------------------------------------------------------------------|------------------------------------------------------------------------------------------------------------------------------------------------------------------------------------------------------------------------------------------------------------------------------------------------------------------------------------------------------------------------------------------------------------------------------------------------------------------------------------------------------------------------------------------------------------------------------------------------------------------------------------------------------------------------------------------------------------------------------------------------------------------------------------------------------------------------------------------------------------------------------------------------------------------------------------------------------------------------------------------------------------------------------------------------------------------------------------------------------------------------------------------------------------------------------------------------------------------------------------------------|------------------------------------------------------------------------------------------------------------------------------------------------------------------------------------------------------------------------------------------------------------------------------------------------------------------------------------------------------------------------------------------------------------------------------------------------------------------------------------------------------------------------------------------------------------------------------------------------------------------------------------------------------------------------------------------------------------------------------------------------------------------------------------------------------------------------------------------|----------|
| <p><b>PICO 7</b></p> | <ul style="list-style-type: none"> <li>• Trauma patients, severe injury with or without haemodynamic stability</li> </ul> | <ul style="list-style-type: none"> <li>• Imaging for identify major sources of acute blood loss following traumatic injury: computed tomography (CT scan), ultrasonography, conventional radiology, whole body, multi-slice, delayed-phase or contrast medium-enhanced CT, torso CT scan/CT scan of the chest, abdominal cavity and pelvic ring</li> <li>• CT scanners integrated into modern resuscitation units and emergency departments as diagnostic measure during the primary survey, pre-hospital primary survey and treatment by trained and experienced emergency personnel and short transportation times</li> <li>• Proximity of the CT scanner to the resuscitation room in the emergency department &lt;50 m</li> <li>• Transport to CT scan room</li> <li>• Transfer to CT scan closely monitored with continued resuscitation measures</li> <li>• Two trained persons trauma team for transfer to CT scan</li> <li>• A doctor with training in airway management, advanced cardiac life support and experience in critical care should accompany all patients who are unstable</li> <li>• The doctor should be experienced and competent in transport medicine, and the other attendant should be a suitable nurse,</li> </ul> | <ul style="list-style-type: none"> <li>• Inattention to or omission of CT scan or only conventional radiology, ultrasonography, CT scan of the chest, abdominal cavity and pelvic ring</li> <li>• Ultrasonography, abdominal ultrasound, chest and limb radiology</li> <li>• No CT scan, ultrasonography and conventional radiographic imaging in emergency department</li> <li>• No pre-hospital completed primary survey and treatment</li> <li>• CT scanner placed at distance &gt;50 m from emergency department</li> <li>• No CT scan</li> <li>• CT scan in emergency department</li> <li>• Ultrasonography</li> <li>• Regular transfer</li> <li>• Monitored transfer without treatment</li> <li>• Regular transfer with stretcher-bears</li> <li>• Emergent surgical intervention</li> <li>• No imaging in pre-hospital</li> </ul> | <p>3</p> |
|----------------------|---------------------------------------------------------------------------------------------------------------------------|------------------------------------------------------------------------------------------------------------------------------------------------------------------------------------------------------------------------------------------------------------------------------------------------------------------------------------------------------------------------------------------------------------------------------------------------------------------------------------------------------------------------------------------------------------------------------------------------------------------------------------------------------------------------------------------------------------------------------------------------------------------------------------------------------------------------------------------------------------------------------------------------------------------------------------------------------------------------------------------------------------------------------------------------------------------------------------------------------------------------------------------------------------------------------------------------------------------------------------------------|------------------------------------------------------------------------------------------------------------------------------------------------------------------------------------------------------------------------------------------------------------------------------------------------------------------------------------------------------------------------------------------------------------------------------------------------------------------------------------------------------------------------------------------------------------------------------------------------------------------------------------------------------------------------------------------------------------------------------------------------------------------------------------------------------------------------------------------|----------|

The European guideline on management of major bleeding and coagulopathy following trauma: Sixth edition

|               |                                                                                                                                                                                                                                                                                                                                                                                         |                                                                                                                                                                                                                                                                                                                                                                                                                                                                                                                                                                               |                                                                                                                                                                                                                                                                                  |   |
|---------------|-----------------------------------------------------------------------------------------------------------------------------------------------------------------------------------------------------------------------------------------------------------------------------------------------------------------------------------------------------------------------------------------|-------------------------------------------------------------------------------------------------------------------------------------------------------------------------------------------------------------------------------------------------------------------------------------------------------------------------------------------------------------------------------------------------------------------------------------------------------------------------------------------------------------------------------------------------------------------------------|----------------------------------------------------------------------------------------------------------------------------------------------------------------------------------------------------------------------------------------------------------------------------------|---|
|               |                                                                                                                                                                                                                                                                                                                                                                                         | <p>paramedic or technician familiar with intensive care procedures</p> <ul style="list-style-type: none"> <li>• Non-surgical interventions</li> <li>• Proximity of the CT scanner to the resuscitation room in the emergency department &lt;50 m</li> <li>• Pre-hospital extended focused assessment with sonography in trauma (eFAST)</li> </ul>                                                                                                                                                                                                                             |                                                                                                                                                                                                                                                                                  |   |
| <b>PICO 8</b> | <p>Adult trauma patients:</p> <ul style="list-style-type: none"> <li>• with torso trauma and/or haemodynamic instability</li> <li>• with intra-abdominal bleeding</li> <li>• with torso trauma</li> <li>• with abdominal trauma</li> <li>• with polytrauma</li> <li>• with multiple injuries</li> <li>• with penetrating torso injuries</li> <li>• with blunt torso injuries</li> </ul> | <ul style="list-style-type: none"> <li>• Focussed assessment with sonography in trauma (FAST)</li> <li>• eFAST</li> <li>• Emergency ultrasound</li> <li>• Emergency room ultrasound</li> <li>• Contrast-enhanced whole-body CT (WBCT)</li> <li>• Early* imaging (WBCT)</li> </ul> <p>*early: immediately or within one hour upon hospital/emergency room/trauma bay admission</p>                                                                                                                                                                                             | <ul style="list-style-type: none"> <li>• No focussed assessment with sonography in trauma (FAST)</li> <li>• No eFAST</li> <li>• No ultrasound</li> <li>• No contrast-enhanced whole-body CT (WBCT)</li> <li>• No early imaging (WBCT)</li> </ul>                                 | 3 |
| <b>PICO 9</b> | <p>Trauma patients (no age restriction):</p> <ul style="list-style-type: none"> <li>• with bleeding prehospital/at site/intrahospital</li> <li>• with/without anticoagulants or antiplatelet agents</li> </ul>                                                                                                                                                                          | <ul style="list-style-type: none"> <li>• Conventional clotting tests (activated partial thromboplastin time [APTT] / prothrombin time [PT]/ fibrinogen/ international normalized ratio [INR]/ PT ratio)</li> <li>• Viscoelastic tests (thromboelastography [TEG]/ rotational thromboelastometry [ROTEM]/ Sonoclot)</li> <li>• Viscoelastic measures of fibrinogen (e.g., functional fibrinogen/ fibrin-based extrinsically activated test with tissue factor and the platelet inhibitor cytochalasin D [FIBTEM])</li> <li>• Point of care tests - all of the above</li> </ul> | <ul style="list-style-type: none"> <li>• Conventional clotting tests (APTT/PT/fibrinogen/INR)</li> <li>• Viscoelastic tests (TEG/ROTEM/Sonoclot) - including fibrinogen measures (functional fibrinogen and FIBTEM)</li> <li>• Point of care tests - all of the above</li> </ul> | 4 |

The European guideline on management of major bleeding and coagulopathy following trauma: Sixth edition

|                       |                                                                                                                                                                                                                                                                                                                                                                                                                             |                                                                                                                                                                                                                                                                                                                                                                                                                                                                                                        |                                                                                                                                                                                                                                                                                                                                                                                                                                                                        |          |
|-----------------------|-----------------------------------------------------------------------------------------------------------------------------------------------------------------------------------------------------------------------------------------------------------------------------------------------------------------------------------------------------------------------------------------------------------------------------|--------------------------------------------------------------------------------------------------------------------------------------------------------------------------------------------------------------------------------------------------------------------------------------------------------------------------------------------------------------------------------------------------------------------------------------------------------------------------------------------------------|------------------------------------------------------------------------------------------------------------------------------------------------------------------------------------------------------------------------------------------------------------------------------------------------------------------------------------------------------------------------------------------------------------------------------------------------------------------------|----------|
| <p><b>PICO 10</b></p> | <ul style="list-style-type: none"> <li>• Adult (&gt;18 years old) trauma patient with and without traumatic intracranial haemorrhage (TICH) including patients with pre-injury antiplatelet medication*</li> </ul> <p>*It is preferable to look at aspirin, clopidogrel, ticagrelor, prasugrel, dual antiplatelet medication and dipyridamole as mentioned in the PICO, but many articles mention “antiplatelet agents”</p> | <ul style="list-style-type: none"> <li>• Point-of-care platelet function monitoring</li> <li>• Whole-blood multiple electrode impedance aggregometry</li> <li>• Platelet function analyser (PFA-100®)</li> <li>• Platelet reactivity assay (e.g., VerifyNow®)</li> <li>• Vasodilator-stimulated phosphoprotein</li> <li>• Viscoelastic devices with channels for measuring platelet function. There is no consensus on the definition or standard threshold of platelet function monitoring</li> </ul> | <ul style="list-style-type: none"> <li>• No platelet function monitoring</li> <li>• Standard laboratory platelet function monitoring#</li> <li>• Coagulation monitoring by viscoelastic tests</li> <li>• Standard laboratory coagulation monitoring</li> </ul> <p>#Light transmission aggregometry is regarded as the gold standard of platelet function testing and is still the most used test for the identification and diagnosis of platelet function defects</p> | <p>4</p> |
| <p><b>PICO 11</b></p> | <ul style="list-style-type: none"> <li>• Bleeding trauma patients with or without traumatic brain injury</li> </ul>                                                                                                                                                                                                                                                                                                         | <ul style="list-style-type: none"> <li>• Permissive hypotension</li> <li>• Restrictive volume replacement</li> <li>• Isotonic crystalloid solution</li> <li>• Vasopressors in severe hypotension</li> <li>• Inotropic agents in myocardial dysfunction</li> <li>• Restrictive transfusions of erythrocytes</li> <li>• Aiming for normothermia</li> </ul>                                                                                                                                               | <ul style="list-style-type: none"> <li>• Normotension</li> <li>• Liberal volume replacement</li> <li>• Saline solutions, hypo- or hypertonic solutions, gelatine solutions, starch solutions</li> <li>• No vasopressors in life-threatening hypotension</li> <li>• No inotropic agents in myocardial dysfunction</li> <li>• Liberal transfusions of erythrocytes</li> <li>• Aiming for hypothermia</li> </ul>                                                          | <p>5</p> |
| <p><b>PICO 12</b></p> | <ul style="list-style-type: none"> <li>• All trauma patients</li> <li>• Severely injured patients presenting deep haemorrhagic shock, signs of bleeding and coagulopathy, Ph &lt;7.2, lactate level &gt; 5, coagulopathy, massive blood loss and low body temperature</li> </ul>                                                                                                                                            | <ul style="list-style-type: none"> <li>• Damage control Surgery and resuscitation</li> <li>• Abbreviated laparotomy</li> <li>• Mass transfusion protocol</li> <li>• Intensive care</li> </ul>                                                                                                                                                                                                                                                                                                          | <ul style="list-style-type: none"> <li>• Definitive repair (no damage control surgery)</li> <li>• No mass transfusion protocol</li> <li>• Traditional volume replacement and transfusion strategy</li> <li>• Definitive surgical repair of all abdominal injuries</li> <li>• Standard care</li> </ul>                                                                                                                                                                  | <p>1</p> |

**The European guideline on management of major bleeding and coagulopathy following trauma: Sixth edition**

|                |                                                                                                                                                                                                                  |                                                                                                                                                                                                                                                                                                                                                                                                                                                                                                                                                                                                                                                                                                                                                                                                                                           |                                                                                                                                                                                                                                                                                                                                                                                                                                                                                                                                                                                                                                                                                                                                                                                                 |   |
|----------------|------------------------------------------------------------------------------------------------------------------------------------------------------------------------------------------------------------------|-------------------------------------------------------------------------------------------------------------------------------------------------------------------------------------------------------------------------------------------------------------------------------------------------------------------------------------------------------------------------------------------------------------------------------------------------------------------------------------------------------------------------------------------------------------------------------------------------------------------------------------------------------------------------------------------------------------------------------------------------------------------------------------------------------------------------------------------|-------------------------------------------------------------------------------------------------------------------------------------------------------------------------------------------------------------------------------------------------------------------------------------------------------------------------------------------------------------------------------------------------------------------------------------------------------------------------------------------------------------------------------------------------------------------------------------------------------------------------------------------------------------------------------------------------------------------------------------------------------------------------------------------------|---|
| <b>PICO 13</b> | <ul style="list-style-type: none"> <li>• Trauma patients with pelvic ring disruption and haemorrhagic shock</li> </ul>                                                                                           | <ul style="list-style-type: none"> <li>• Pelvic closure, haemorrhagic control with packing, embolization, vascular surgery</li> </ul>                                                                                                                                                                                                                                                                                                                                                                                                                                                                                                                                                                                                                                                                                                     | <ul style="list-style-type: none"> <li>• No surgical intervention or interventional radiology</li> <li>• Standard care</li> <li>• Conservative treatment</li> </ul>                                                                                                                                                                                                                                                                                                                                                                                                                                                                                                                                                                                                                             | 2 |
| <b>PICO 14</b> | <p>Trauma patients:</p> <ul style="list-style-type: none"> <li>• with intrathoracic and or/intra-abdominal visceral bleeding</li> <li>• bleeding from soft tissue or bone in the pre-hospital setting</li> </ul> | <ul style="list-style-type: none"> <li>• Application of local haemostatic products on bleeding surfaces</li> </ul>                                                                                                                                                                                                                                                                                                                                                                                                                                                                                                                                                                                                                                                                                                                        | <ul style="list-style-type: none"> <li>• No application of those products or application of other non-haemostatic agents</li> <li>• Standard care</li> </ul>                                                                                                                                                                                                                                                                                                                                                                                                                                                                                                                                                                                                                                    | 6 |
| <b>PICO 15</b> | <ul style="list-style-type: none"> <li>• All ages with trauma at the scene/or in hospital</li> </ul>                                                                                                             | <ul style="list-style-type: none"> <li>• Tranexamic acid/anti-fibrinolytic drugs</li> </ul>                                                                                                                                                                                                                                                                                                                                                                                                                                                                                                                                                                                                                                                                                                                                               | <ul style="list-style-type: none"> <li>• No tranexamic acid/anti-fibrinolytic drugs</li> </ul>                                                                                                                                                                                                                                                                                                                                                                                                                                                                                                                                                                                                                                                                                                  | 6 |
| <b>PICO 16</b> | <ul style="list-style-type: none"> <li>• Adult trauma patients with expected massive haemorrhage or major injury</li> </ul>                                                                                      | <ul style="list-style-type: none"> <li>• Fresh frozen plasma (FFP), cryoprecipitate, fibrinogen and factor XIII administration by trauma teams, anaesthesiologists and surgeons</li> <li>• Liberal and prophylactic FFP administration</li> <li>• FFP in a fixed ratio of FFP:RBC (e.g., 1:1 or 1:2) or FFP:RBC:platelet (e.g., 1:1:1)</li> <li>• FFP transfusion for fibrinogen depletion or hypofibrinogenaemia</li> <li>• FFP+RBC as initial management</li> <li>• Fibrinogen concentrate and/or prothrombin concentrate and/or factor XIII</li> <li>• Freeze-dried plasma</li> <li>• Coagulation monitoring and transfusion triggers</li> <li>• Transfusion based on viscoelastic methods and visco haemostatic assays</li> <li>• Transfusion based on rotational thromboelastometry (ROTEM) and thromboelastography (TEG)</li> </ul> | <ul style="list-style-type: none"> <li>• Standard care administered by trauma teams, anaesthesiologists and surgeons</li> <li>• No liberal or prophylactic FFP administration</li> <li>• Liberal transfusion regime using FFP</li> <li>• Fibrinogen concentrate</li> <li>• Substitution for fibrinogen depletion or hypofibrinogenaemia</li> <li>• RBC only as initial management</li> <li>• FFP and cryoprecipitate and platelet transfusion</li> <li>• FFP and cryoprecipitate and platelet transfusion instead of freeze dried</li> <li>• Standard care</li> <li>• Standard laboratory and coagulation tests (INR, PT and APTT)</li> <li>• No point of care tests</li> <li>• No pre-defined transfusion triggers and standard care</li> <li>• No algorithm transfusion management</li> </ul> | 8 |

The European guideline on management of major bleeding and coagulopathy following trauma: Sixth edition

|                |                                                                                                                                                                                                                                                                                                                                                                                                                                                                                                                |                                                                                                                                                                                                                                                                                                                                                                                                                                                                                                                                                                                                                                                                                                                                                                                                                                                      |                                                                                                                                                                                                                                                                                                                                                                                                                                            |    |
|----------------|----------------------------------------------------------------------------------------------------------------------------------------------------------------------------------------------------------------------------------------------------------------------------------------------------------------------------------------------------------------------------------------------------------------------------------------------------------------------------------------------------------------|------------------------------------------------------------------------------------------------------------------------------------------------------------------------------------------------------------------------------------------------------------------------------------------------------------------------------------------------------------------------------------------------------------------------------------------------------------------------------------------------------------------------------------------------------------------------------------------------------------------------------------------------------------------------------------------------------------------------------------------------------------------------------------------------------------------------------------------------------|--------------------------------------------------------------------------------------------------------------------------------------------------------------------------------------------------------------------------------------------------------------------------------------------------------------------------------------------------------------------------------------------------------------------------------------------|----|
|                |                                                                                                                                                                                                                                                                                                                                                                                                                                                                                                                | <ul style="list-style-type: none"> <li>• FFP and coagulation factor therapy (fibrinogen concentrate, prothrombin concentrate) based on pre-specified transfusion triggers</li> <li>• Algorithm based coagulation and transfusion management</li> <li>• Transfusion triggers</li> <li>• Prophylactic tranexamic acid and antifibrinolytics</li> <li>• Fibrinogen concentrate/cryo</li> <li>• Pre-hospital, in-hospital, surgical procedure and post-procedure</li> <li>• Fibrinogen/cryo administration</li> <li>• Fibrinogen concentrate</li> <li>• Fibrinogen concentrate based on viscoelastic/visco haemostatic assays and algorithm</li> <li>• Ionized calcium measurement and monitoring and calcium administration</li> <li>• Point of care calcium measurement</li> <li>• Calcium chloride and/or calcium gluconate administration</li> </ul> | <ul style="list-style-type: none"> <li>• Fixed ratio coagulation and transfusion treatment</li> <li>• No prophylactic tranexamic acid and antifibrinolytics</li> <li>• Standard care, placebo or saline vs cryoprecipitate vs FFP</li> <li>• Fibrinogen concentrate based on transfusion triggers</li> <li>• Standard laboratory tests</li> <li>• No calcium administration</li> </ul>                                                     |    |
| <b>PICO 17</b> | <p>Adult trauma patients:</p> <ul style="list-style-type: none"> <li>• with bleeding</li> <li>• with (acute) trauma haemorrhage</li> <li>• with haemorrhagic shock</li> <li>• with severe bleeding</li> <li>• with ongoing haemorrhage</li> <li>• with acute traumatic coagulopathy</li> <li>• with haemostatic abnormalities</li> <li>• with acquired coagulopathy</li> <li>• with concern for coagulopathy</li> <li>• with traumatic brain injury and bleeding with or without acute coagulopathy</li> </ul> | <ul style="list-style-type: none"> <li>• Goal-directed therapeutic treatment algorithm</li> <li>• Viscoelastic haemostatic assay-based treatment algorithm/transfusion strategy</li> <li>• Conventional coagulation assay-based treatment algorithm</li> <li>• Point-of-care testing-based algorithm</li> <li>• Early coagulation monitoring</li> <li>• Early coagulation assessment</li> <li>• Point-of-care testing monitoring</li> </ul>                                                                                                                                                                                                                                                                                                                                                                                                          | <ul style="list-style-type: none"> <li>• No therapy</li> <li>• No monitoring</li> <li>• No assessment</li> <li>• No goal-directed therapeutic treatment algorithm</li> <li>• No viscoelastic haemostatic assay-based treatment algorithm or transfusion strategy</li> <li>• Conventional coagulation assay-based treatment algorithm</li> <li>• Point-of-care testing-based algorithm</li> <li>• Any other transfusion strategy</li> </ul> | 13 |

The European guideline on management of major bleeding and coagulopathy following trauma: Sixth edition

|                |                                                                                                                                                                                                                                                                                                                                                                                                                                                                                                                                                        |                                                                                                                                                                                                                                                                                                                                                                                                                                                                                                                                                                                                                                                     |                                                                                                                                                                                                                                                                                                                                                                                                                                                                                                                                                                                                                       |   |
|----------------|--------------------------------------------------------------------------------------------------------------------------------------------------------------------------------------------------------------------------------------------------------------------------------------------------------------------------------------------------------------------------------------------------------------------------------------------------------------------------------------------------------------------------------------------------------|-----------------------------------------------------------------------------------------------------------------------------------------------------------------------------------------------------------------------------------------------------------------------------------------------------------------------------------------------------------------------------------------------------------------------------------------------------------------------------------------------------------------------------------------------------------------------------------------------------------------------------------------------------|-----------------------------------------------------------------------------------------------------------------------------------------------------------------------------------------------------------------------------------------------------------------------------------------------------------------------------------------------------------------------------------------------------------------------------------------------------------------------------------------------------------------------------------------------------------------------------------------------------------------------|---|
|                | <p>All adult traumatic brain injury (TBI) patients:</p> <ul style="list-style-type: none"> <li>• with intracranial haemorrhage</li> <li>• with intracranial bleeding</li> <li>• with ongoing intracranial bleeding</li> <li>• with progression of intracranial haemorrhage</li> <li>• with bleeding progression</li> <li>• with expansion of haemorrhagic lesions</li> <li>• with delayed intracranial haemorrhage</li> <li>• with haemostatic abnormalities</li> <li>• with acquired coagulopathy</li> <li>• with concern for coagulopathy</li> </ul> |                                                                                                                                                                                                                                                                                                                                                                                                                                                                                                                                                                                                                                                     |                                                                                                                                                                                                                                                                                                                                                                                                                                                                                                                                                                                                                       |   |
| <b>PICO 18</b> | <p>Adult (&gt;18 years old) trauma patients:</p> <ul style="list-style-type: none"> <li>• with major bleeding</li> <li>• with TBI</li> <li>• with thrombocytopenia and/or coagulopathy</li> <li>• with intracranial haemorrhage (TICH)</li> </ul>                                                                                                                                                                                                                                                                                                      | <ul style="list-style-type: none"> <li>• Platelet transfusion</li> <li>• Fresh, room-temperature and ABO-compatible platelets</li> <li>• Old platelets</li> <li>• ABO-identical platelets</li> <li>• ABO-incompatible platelets</li> <li>• Cold-stored platelets</li> <li>• Pathogen-reduced platelets</li> <li>• Single-unit platelet</li> <li>• Apheresis platelets</li> <li>• Buffy coat platelets</li> <li>• Platelet-rich plasma</li> <li>• Early platelet transfusion based on ratio of blood products</li> <li>• 1:1:1 ratio of blood products</li> <li>• 2:1:1 ratio of blood products</li> <li>• Other ratios of blood products</li> </ul> | <ul style="list-style-type: none"> <li>• Alternatives to platelet transfusion</li> <li>• No platelet transfusion</li> <li>• Tranexamic acid</li> <li>• Fibrinogen/cryoprecipitate</li> <li>• Desmopressin</li> <li>• Synthetic platelets</li> <li>• Plasma transfusion</li> <li>• Alternatives to platelets given in fixed ratio with red blood cells and plasma</li> <li>• Platelet transfusion based on viscoelastic/visco haemostatic tests</li> <li>• Platelet transfusion based on platelet count</li> <li>• Platelet transfusion based on platelet function tests</li> <li>• No platelet transfusion</li> </ul> | 8 |
| <b>PICO 19</b> | <ul style="list-style-type: none"> <li>• Bleeding trauma patient</li> </ul>                                                                                                                                                                                                                                                                                                                                                                                                                                                                            | <ul style="list-style-type: none"> <li>• Administration of recombinant activated coagulation factor VII</li> </ul>                                                                                                                                                                                                                                                                                                                                                                                                                                                                                                                                  | <ul style="list-style-type: none"> <li>• No administration of recombinant activated coagulation factor VII</li> </ul>                                                                                                                                                                                                                                                                                                                                                                                                                                                                                                 | 6 |



The European guideline on management of major bleeding and coagulopathy following trauma: Sixth edition

|                |                                                                                                                                                                                                                                                                                                                                                                                                                                                                                                                                                                                                          |                                                                                                                                                                                                                                                                                                                                                                                                                                                                                                                                                                                 |                                                                                                                                                                                                                                                                                                                                                                                                |   |
|----------------|----------------------------------------------------------------------------------------------------------------------------------------------------------------------------------------------------------------------------------------------------------------------------------------------------------------------------------------------------------------------------------------------------------------------------------------------------------------------------------------------------------------------------------------------------------------------------------------------------------|---------------------------------------------------------------------------------------------------------------------------------------------------------------------------------------------------------------------------------------------------------------------------------------------------------------------------------------------------------------------------------------------------------------------------------------------------------------------------------------------------------------------------------------------------------------------------------|------------------------------------------------------------------------------------------------------------------------------------------------------------------------------------------------------------------------------------------------------------------------------------------------------------------------------------------------------------------------------------------------|---|
|                | <ul style="list-style-type: none"> <li>• Bleeding patient undergoing surgery due to trauma</li> <li>• Bleeding patient on extracorporeal membrane oxygenation support</li> <li>• Bleeding patient undergoing elective major surgery</li> </ul>                                                                                                                                                                                                                                                                                                                                                           |                                                                                                                                                                                                                                                                                                                                                                                                                                                                                                                                                                                 |                                                                                                                                                                                                                                                                                                                                                                                                |   |
| <b>PICO 20</b> | <ul style="list-style-type: none"> <li>• All ages with trauma, at scene or in hospital, including traumatic head injury</li> <li>• Patients taking vitamin K antagonists/ direct-acting oral anticoagulants (DOAC)/anti-platelet agents</li> </ul>                                                                                                                                                                                                                                                                                                                                                       | <ul style="list-style-type: none"> <li>• Reversal of vitamin K-dependent oral anticoagulants</li> <li>• Reversal of dabigatran anticoagulation with idarucizumab</li> <li>• Reversal of anticoagulation due to apixaban, edoxaban or rivaroxaban with andexanet alfa</li> <li>• Anticoagulation monitoring based on ROTEM, TEG, visco haemostatic and viscoelastic test</li> </ul>                                                                                                                                                                                              | <ul style="list-style-type: none"> <li>• No reversal therapy</li> <li>• Reversal of dabigatran anticoagulation with prothrombin complex concentrate</li> <li>• Reversal of anticoagulation due to apixaban, edoxaban or rivaroxaban with prothrombin concentrate</li> <li>• Anticoagulation monitoring based on anti Xa activity, (diluted) thrombin time, PT and coagulation tests</li> </ul> | 7 |
| <b>PICO 21</b> | <p>Adult (&gt;18 years old) trauma patients on antiplatelet agents:</p> <ul style="list-style-type: none"> <li>• with major bleeding</li> <li>• including patients with TBI</li> <li>• including patients with thrombocytopenia</li> <li>• including patients with intracranial bleeding</li> <li>• (aspirin, clopidogrel, ticagrelor, prasugrel, dual antiplatelet medication, dipyridamole or the term antiplatelet agents)</li> </ul> <p>Adult (&gt; 18 years old) trauma patient:</p> <ul style="list-style-type: none"> <li>• with major bleeding</li> <li>• including patients with TBI</li> </ul> | <ul style="list-style-type: none"> <li>• Platelet transfusion</li> <li>• Platelet transfusion based on platelet count</li> <li>• Platelet transfusion based on platelet function tests</li> <li>• Platelet transfusion based on viscoelastic/visco haemostatic tests</li> <li>• Platelet transfusion based on ratios of blood products</li> <li>• Platelet transfusion based on algorithm or transfusion trigger</li> <li>• Pre-injury antiplatelet medication: aspirin, clopidogrel, ticagrelor and prasugrel</li> <li>• Dual antiplatelet medication: dipyridamole</li> </ul> | <ul style="list-style-type: none"> <li>• Alternatives</li> <li>• Tranexamic acid</li> <li>• Desmopressin</li> <li>• Recombinant factor VIIa</li> <li>• No platelet transfusion</li> <li>• Platelet transfusion based on target value/range</li> <li>• No pre-injury antiplatelet medication</li> <li>• Pre-injury oral anticoagulation (antivitamin K or DOAC)</li> </ul>                      | 8 |

The European guideline on management of major bleeding and coagulopathy following trauma: Sixth edition

|                 |                                                                                                                                                                                                                                                                                                                                                                                                                                                                                                                                                             |                                                                                                                                                                                                                                                                                                                          |                                                                                                                                                                                                                                                                                                                           |    |
|-----------------|-------------------------------------------------------------------------------------------------------------------------------------------------------------------------------------------------------------------------------------------------------------------------------------------------------------------------------------------------------------------------------------------------------------------------------------------------------------------------------------------------------------------------------------------------------------|--------------------------------------------------------------------------------------------------------------------------------------------------------------------------------------------------------------------------------------------------------------------------------------------------------------------------|---------------------------------------------------------------------------------------------------------------------------------------------------------------------------------------------------------------------------------------------------------------------------------------------------------------------------|----|
|                 | <ul style="list-style-type: none"> <li>• including patients with thrombocytopenia</li> <li>• including patients with intracranial bleeding</li> </ul>                                                                                                                                                                                                                                                                                                                                                                                                       |                                                                                                                                                                                                                                                                                                                          |                                                                                                                                                                                                                                                                                                                           |    |
| <b>PICO 22</b>  | <ul style="list-style-type: none"> <li>• All ages (but mostly 16 years and above)</li> <li>• In hospital</li> <li>• Post-discharge</li> <li>• Specifically, immediately after injury vs longer after injury</li> </ul>                                                                                                                                                                                                                                                                                                                                      | <ul style="list-style-type: none"> <li>• Pharmacological thromboprophylaxis (unfractionated heparin/low molecular weight heparin/DOAC)</li> <li>• Mechanical thromboprophylaxis</li> <li>• Pneumatic compression</li> <li>• Internal vena cava filter</li> </ul>                                                         | <ul style="list-style-type: none"> <li>• Mechanical thromboprophylaxis</li> <li>• Pharmacological</li> <li>• Thromboprophylaxis (another type)</li> <li>• Combination mechanical and chemical thromboprophylaxis</li> <li>• Stockings</li> <li>• No thromboprophylaxis</li> <li>• No internal vena cava filter</li> </ul> | 7  |
| <b>PICO 23</b>  | <ul style="list-style-type: none"> <li>• Acute care medical trauma teams anaesthesiologists, trauma surgeons</li> </ul>                                                                                                                                                                                                                                                                                                                                                                                                                                     | <ul style="list-style-type: none"> <li>• Active intervention to implement the guideline</li> <li>• Repetitive educational activities</li> <li>• Monitoring of guideline adherence</li> <li>• Institutional quality program feedback</li> <li>• Introduction of bundles, checklists and coagulation algorithms</li> </ul> | <ul style="list-style-type: none"> <li>• Standard care</li> <li>• No active intervention</li> </ul>                                                                                                                                                                                                                       | 12 |
| <b>PICO 24*</b> | <ul style="list-style-type: none"> <li>• Adult trauma patients with or without suspected bleeding</li> <li>• ISS &gt;15 and multiple injuries with/without haemodynamic instability (systolic blood pressure &lt;90 mmHg; SI &gt;0,9)</li> <li>• Torso trauma (AIS abdomen &gt;2) with/without haemodynamic instability (AIS abdomen &lt;90 mmHg; SI &gt;0,9)</li> <li>• Abdominal trauma (AIS abdomen &gt;2)</li> <li>• Thoracic trauma (AIS thorax &gt;2) and/or penetrating thoracic injuries and/or blunt thoracic injuries with/without and</li> </ul> | <ul style="list-style-type: none"> <li>• Point of care ultrasound</li> <li>• Prehospital ultrasound</li> </ul>                                                                                                                                                                                                           | <ul style="list-style-type: none"> <li>• No prehospital ultrasound</li> </ul>                                                                                                                                                                                                                                             | 3  |

**The European guideline on management of major bleeding and coagulopathy following trauma: Sixth edition**

|                |                                                                                                                                                                                                                                                                                                                    |                                                                                                                                   |                                                                                                                    |   |
|----------------|--------------------------------------------------------------------------------------------------------------------------------------------------------------------------------------------------------------------------------------------------------------------------------------------------------------------|-----------------------------------------------------------------------------------------------------------------------------------|--------------------------------------------------------------------------------------------------------------------|---|
|                | <ul style="list-style-type: none"> <li>haemodynamic instability (AIS abdomen &lt;90 mmHg; SI &gt;0,9)</li> <li>• Pelvic injury (AIS pelvis &gt;2) and/or penetrating pelvic injuries and/or blunt pelvic injuries</li> <li>• Polytrauma (ISS &gt;15)</li> <li>• Penetrating and/or blunt torso injuries</li> </ul> |                                                                                                                                   |                                                                                                                    |   |
| <b>PICO 25</b> | <ul style="list-style-type: none"> <li>• Bleeding trauma patient</li> </ul>                                                                                                                                                                                                                                        | <ul style="list-style-type: none"> <li>• Administration of blood/FFP transfusions or fibrinogen at prehospital setting</li> </ul> | <ul style="list-style-type: none"> <li>• No administration of blood transfusions at prehospital setting</li> </ul> | 8 |

\*Omitted from the search strategy due to the volume of results.

**REFERENCE**

1. Mutschler M, Nienaber U, Brockamp T, Wafaisade A, Fabian T, Paffrath T, Bouillon B, Maegele M, TraumaRegister DGU: Renaissance of base deficit for the initial assessment of trauma patients: a base deficit-based classification for hypovolemic shock developed on data from 16,305 patients derived from the TraumaRegister DGU®. Crit Care 2013, 17(2):R42.
