# Supplementary material for: The European guideline on management of major bleeding and coagulopathy following trauma: sixth edition
Source: Crit Care. 2023 Mar 1;27:80. doi: 10.1186/s13054-023-04327-7 (PMC9977110; doi:10.1186/s13054-023-04327-7)

# The European guideline on management of major bleeding and coagulopathy following trauma: sixth edition (2023)

Rolf Rossaint, Arash Afshari, Bertil Bouillon, Vladimir Cerny, Diana Cimpoesu, Nicola Curry, Jacques Duranteau, Daniela Filipescu, Oliver Grottke, Lars Grønlykke, Anatole Harrois, Beverley J. Hunt, Alexander Kaserer, Radko Komadina, Mikkel Herold Madsen, Marc Maegele, Lidia Mora, Louis Riddez, Carolina S Romero, Charles-Marc Samama, Jean-Louis Vincent, Sebastian Wiberg, Donat R. Spahn

*Crit Care* 27 (2023)

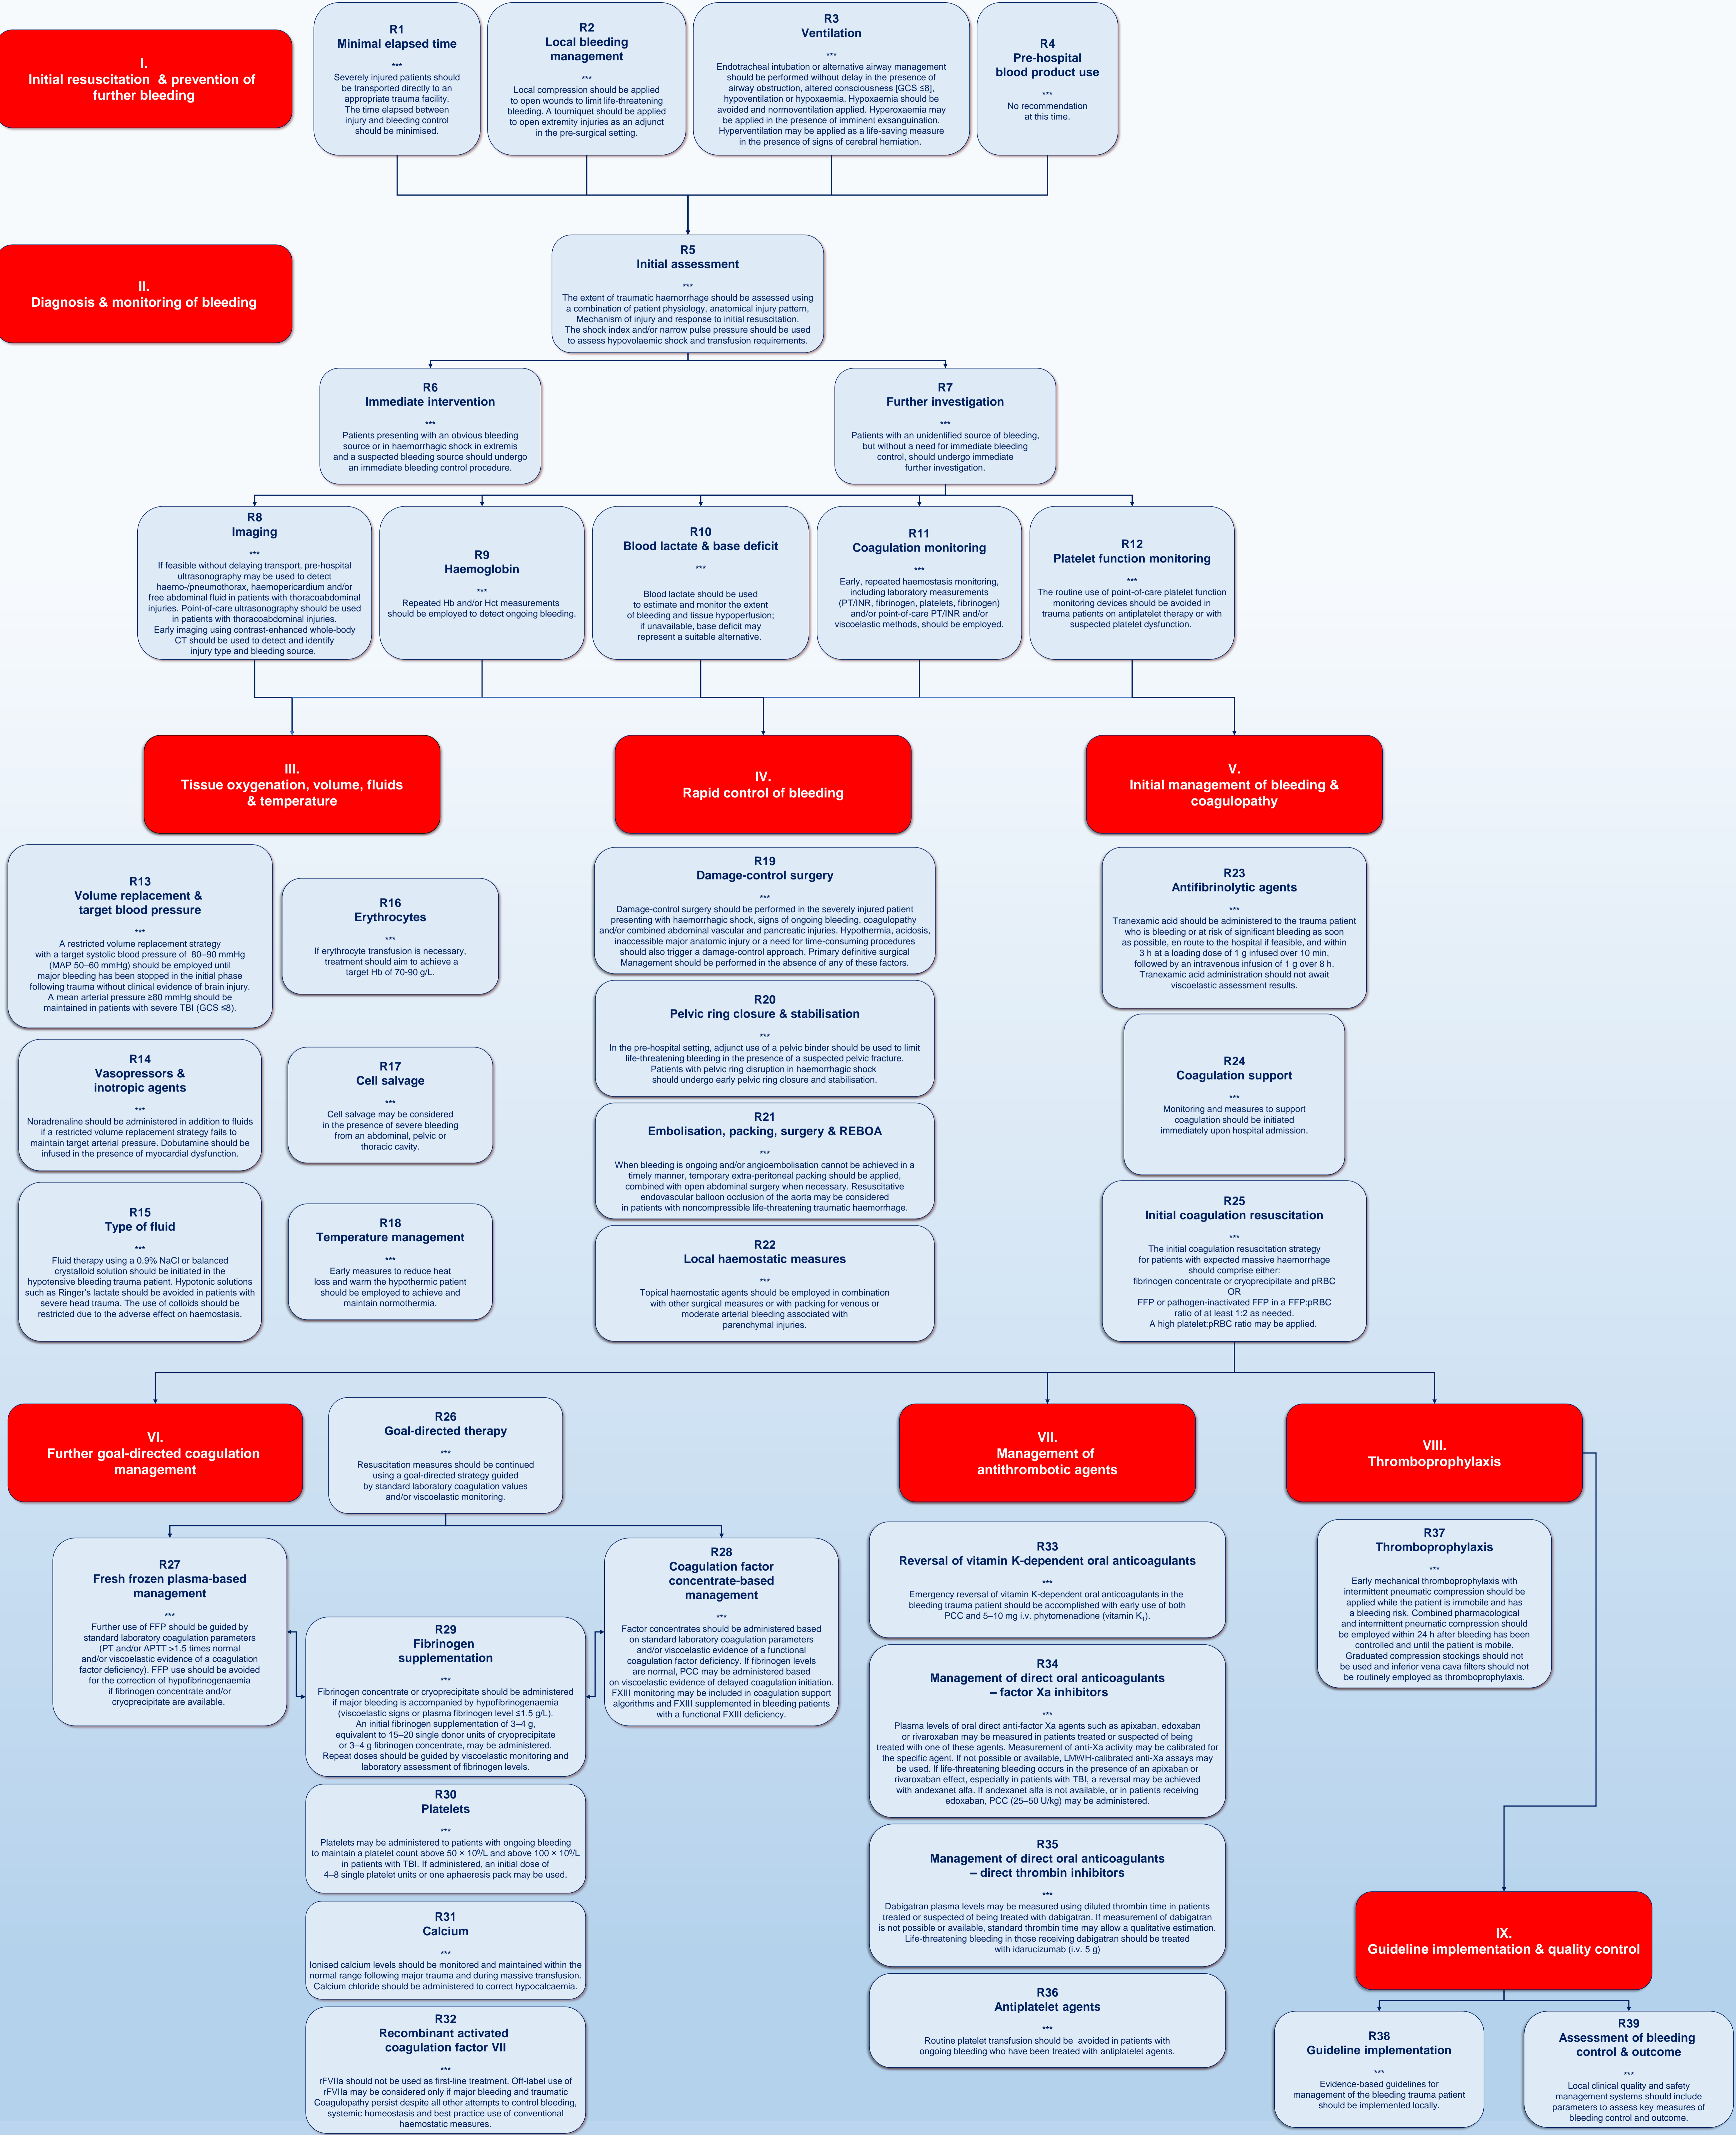

Supplement: Supplementary file 4 — Additional file 4. Summary of treatment modalities for the bleeding trauma patient included in this guideline (A0 poster). [file 13054_2023_4327_MOESM4_ESM.pdf]
